# Supplementary material
Source: PubMed Central journal article supplement (PMC2898372)

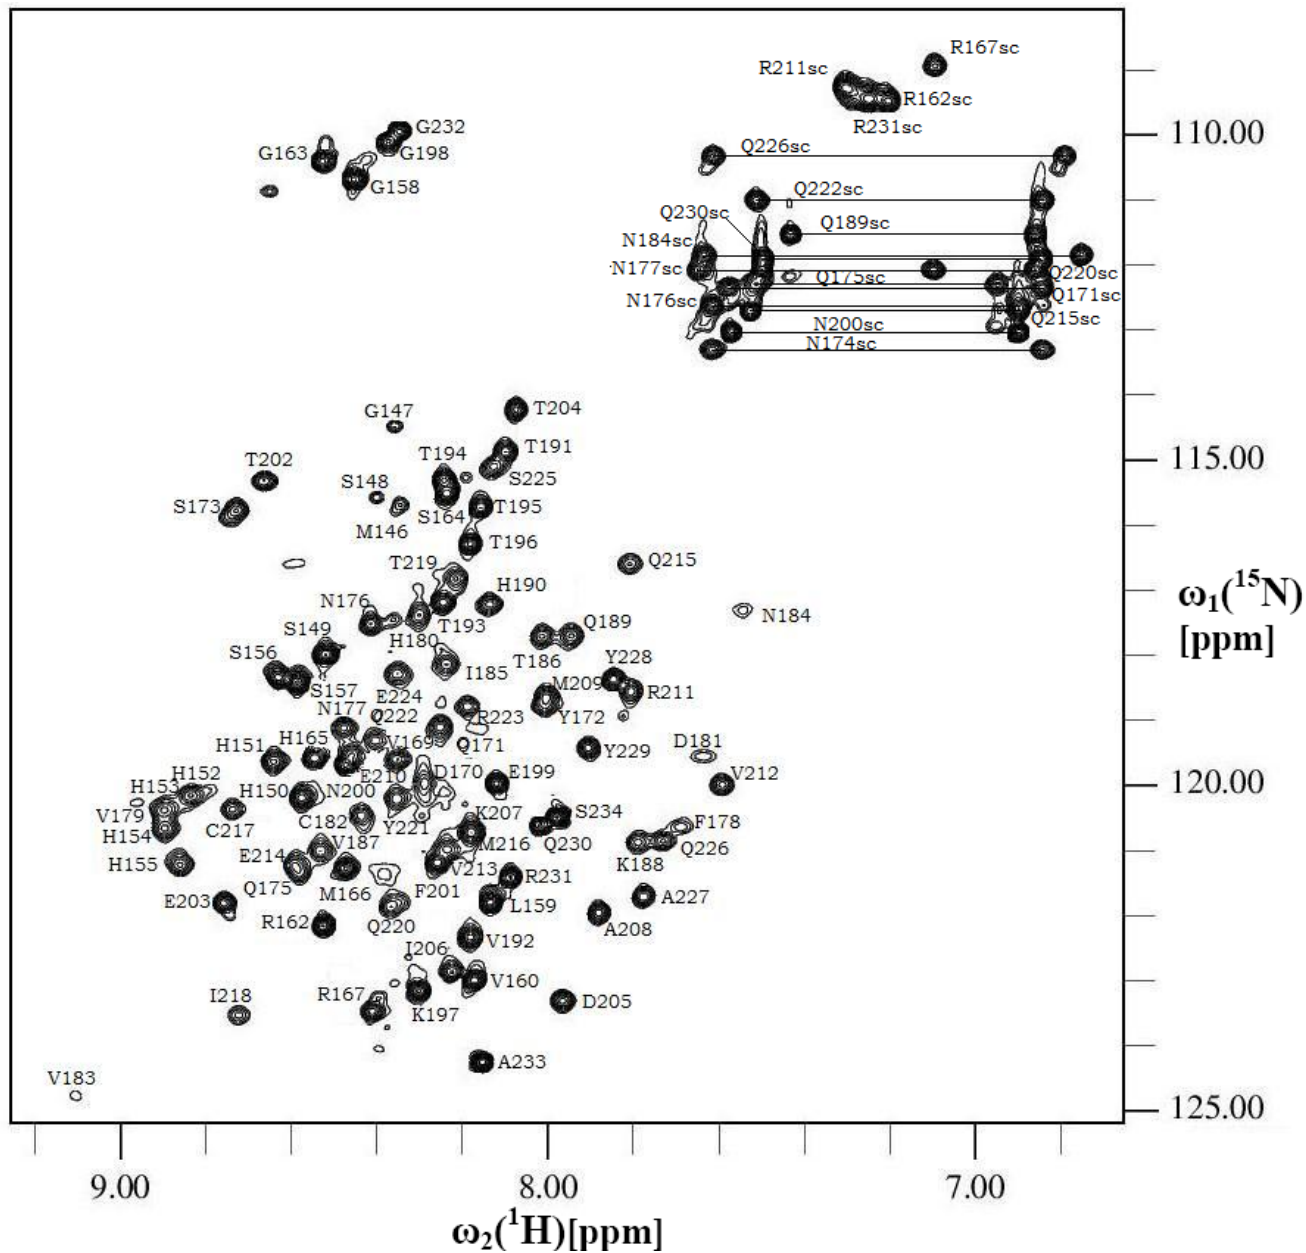

**FIGURE S1** – HSQC spectrum of  $^{15}\text{N}$  labelled ovH2H3\_I208A recorded at 25°C and 600 MHz.

Supplement: supp_M110.111815_jbc.M110.111815-1.pdf [file supp_M110.111815_jbc.M110.111815-1.pdf]
